# Supplementary material
Source: PubMed Central journal article supplement (PMC5735050)
Supplement: JOA-232-158-s001.pdf [file JOA-232-158-s001.pdf]

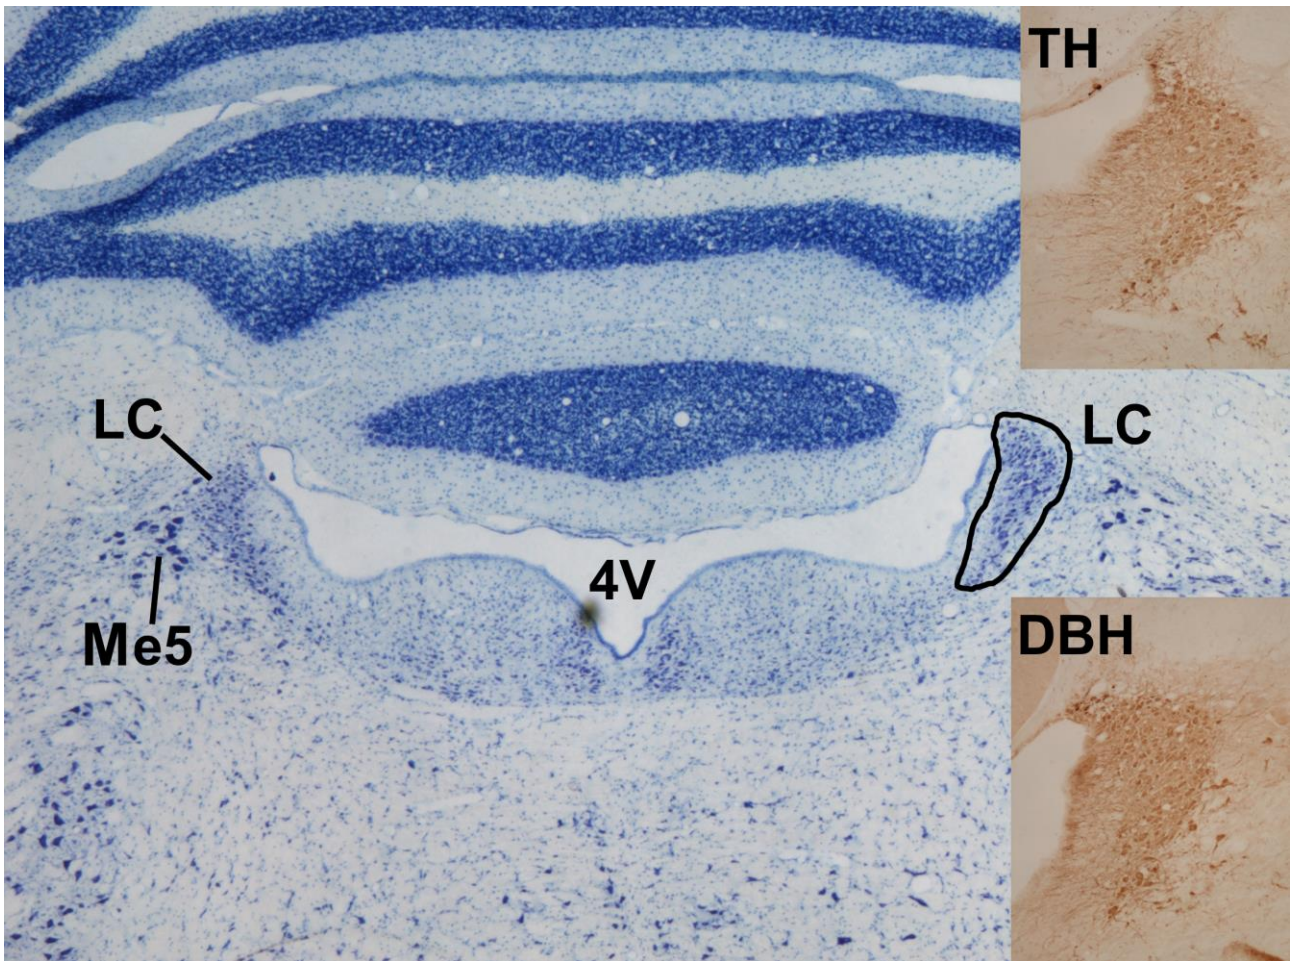

Cryostat section of a rat brain used as positive control to verify the labeling quality of the primary antibodies. Nissl staining was performed to identify the *locus coeruleus* (LC). Insert in the upper right corner indicates TH immunoreactivity in LC while insert in the lower right corner indicates DBH immunoreactivity in the LC. Me5, mesencephalic trigeminal nucleus; 4V, 4th ventricle.

## SUPPLEMENTARY MATERIAL

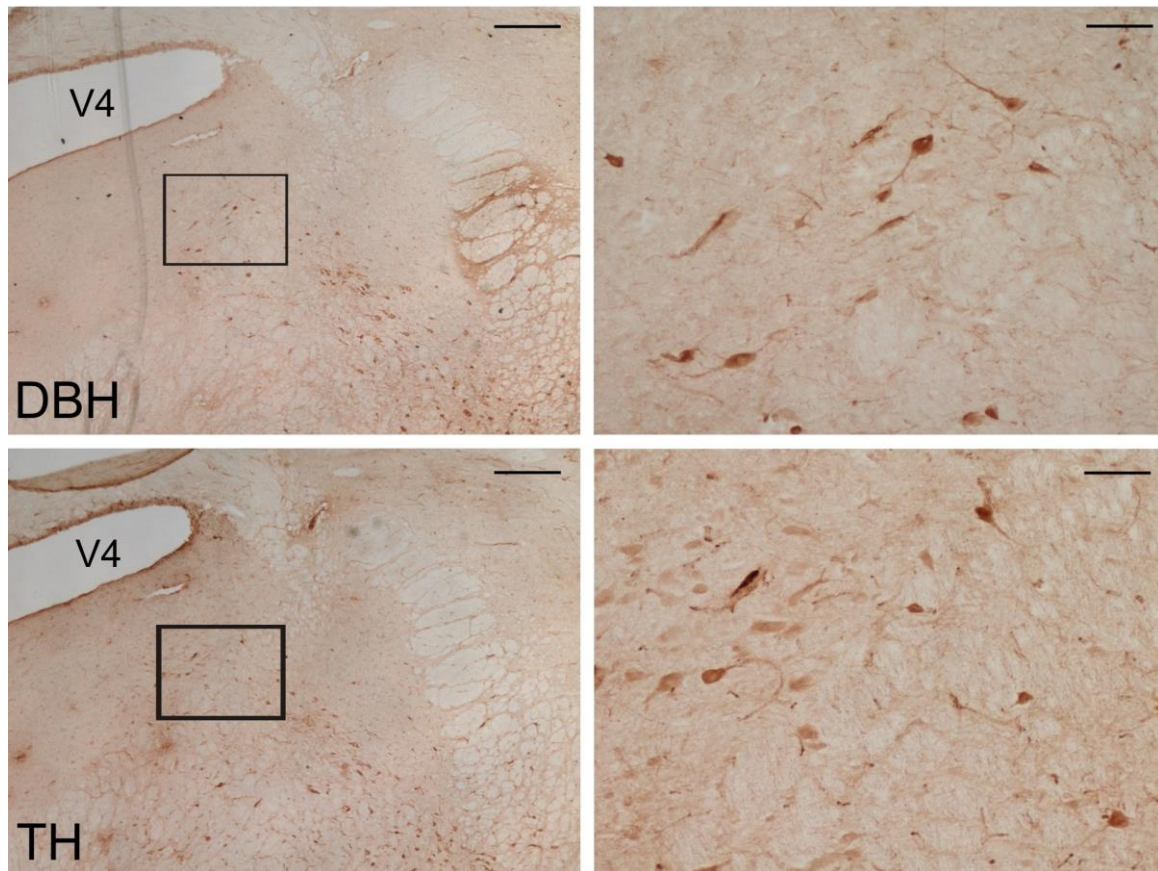

Figure 2. Positive neurons to DBH and TH immunoperoxidase reaction on cryostat sections of the pig brainstem at level of the locus ceruleus (black rectangles). V4, ventriculus quartus. Scale bars on the left = 500 µm, on the right = 100 µm

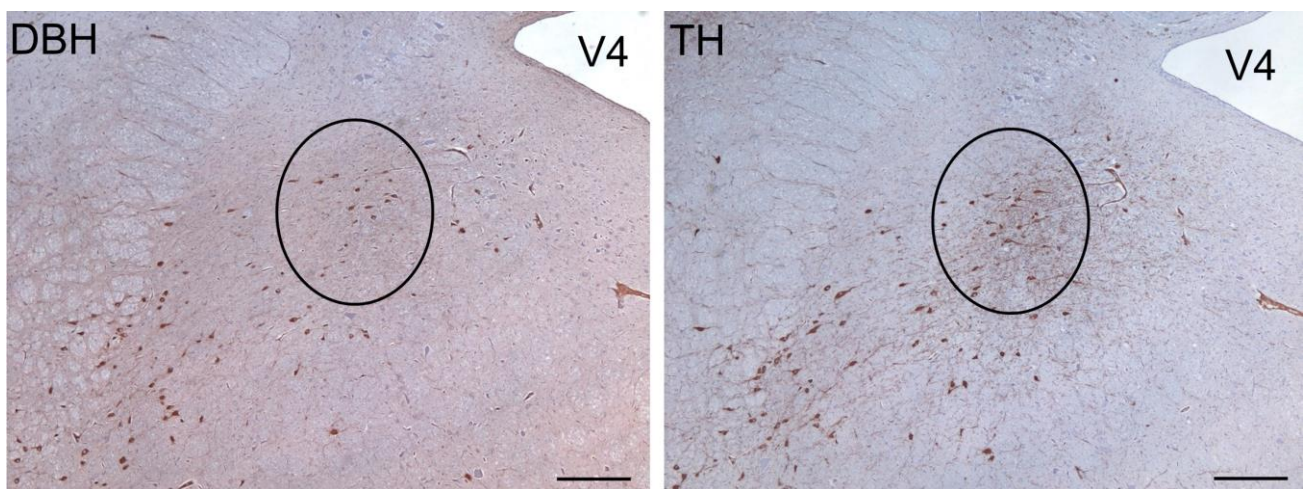

Figure 3. Positive neurons to DBH and TH immunoperoxidase reaction on paraffin sections of the pig brainstem at level of the locus ceruleus (black circles). V4, ventriculus quartus. Scale bars = 500 µm.
